# Supplementary material
Source: HighWire-hosted journal article supplement (https://qualitysafety.bmj.com/content/28/10/826)
Supplement: inline-supplementary-material-1 [file inline-supplementary-material-1.pdf]

**Management of low back pain in Australian emergency departments**

**Supplementary file 1.** SNOMED CT-AU (EDRS) codes related to low back pain presentations

**Supplementary file 2.** Frequency (%) of diagnoses of disorders beyond the lumbar spine (n = 7,631) and percentage (%) in relation to the total number of ED presentations (n = 14,024)

**Supplementary file 3.** Medication list as per the ATC Classification System.

**Supplementary file 4.** List of opioids used in the ED (n = 2395)

**Supplementary file 5.** Factors associated with arriving by ambulance (n = 5986)

**Supplementary file 6.** Factors associated with of any lumbar spine imaging (n = 5986)

**Supplementary file 7.** Factors associated with use of opioids (n = 2395)

**Supplementary file 8.** Factors associated with admission to hospital (n = 5986)

Supplementary file 1. SNOMED CT-AU (EDRS) codes related to low back pain presentations

| Description                                                                   | Codes     |
|-------------------------------------------------------------------------------|-----------|
| <b>Low back pain with non-specific cause</b>                                  |           |
| Acute low back pain (finding)                                                 | 278862001 |
| Back pain complicating pregnancy (disorder)                                   | 91957002  |
| Backache (finding)                                                            | 161891005 |
| Blunt injury to back (disorder)                                               | 424270008 |
| Chronic back pain (finding)                                                   | 134407002 |
| Chronic low back pain (finding)                                               | 278860009 |
| Coccyx sprain (disorder)                                                      | 209571002 |
| Complaining of low back pain (finding)                                        | 161894002 |
| Degeneration of lumbar intervertebral disc (disorder)                         | 26538006  |
| Displacement of lumbar intervertebral disc without myelopathy                 | 20021007  |
| Exacerbation of backache (finding)                                            | 135860001 |
| Low back pain (finding)                                                       | 279039007 |
| Low back strain (disorder)                                                    | 300956001 |
| Lower back injury (disorder)                                                  | 282766005 |
| Lumbar spondylosis (disorder)                                                 | 239880009 |
| Lumbar sprain (disorder)                                                      | 209565008 |
| Mechanical low back pain (finding)                                            | 279040009 |
| Pain in the coccyx (finding)                                                  | 34789001  |
| Sacral back pain (finding)                                                    | 61486003  |
| Spasm of back muscles (finding)                                               | 203095000 |
| Sprain of ligament of lumbosacral joint (disorder)                            | 209548004 |
| Stiff back (finding)                                                          | 249921008 |
| Strain of back muscle (disorder)                                              | 262965006 |
| Strain of tendon of back (disorder)                                           | 262975009 |
| <b>Low back pain with neurological signs and symptoms</b>                     |           |
| Acute back pain with sciatica (finding)                                       | 247366003 |
| Acute sciatica (disorder)                                                     | 307176005 |
| Chronic sciatica (disorder)                                                   | 307177001 |
| Injury of lumbar nerve roots (disorder)                                       | 24300005  |
| Injury of sciatic nerve (disorder)                                            | 86269002  |
| Lumbago with sciatica (finding)                                               | 202794004 |
| Lumbago-sciatica due to displacement of lumbar intervertebral disc (disorder) | 46960006  |
| Lumbar disc prolapse with radiculopathy (disorder)                            | 202735001 |
| Lumbar radiculopathy (disorder)                                               | 128196005 |
| Sciatica (disorder)                                                           | 23056005  |
| Spinal stenosis of lumbar region (disorder)                                   | 18347007  |
| <b>Low back pain due to serious pathology</b>                                 |           |
| Abscess of back (disorder)                                                    | 309083007 |
| Abscess of back, except buttock (disorder)                                    | 19284003  |
| Cauda equina syndrome (disorder)                                              | 192970008 |
| Closed fracture lumbar vertebra (disorder)                                    | 207957008 |
| Collapse of lumbar vertebra (disorder)                                        | 308758008 |
| Compression fracture of lumbar spine (disorder)                               | 426646004 |
| Concussion and edema of lumbar spinal cord (disorder)                         | 212360005 |
| Contusion of back (disorder)                                                  | 11437003  |
| Contusion of lower back (disorder)                                            | 284062002 |
| Crush fracture of lumbar vertebra (disorder)                                  | 281933002 |
| Disc prolapse with myelopathy (disorder)                                      | 202728009 |
| Discitis (disorder)                                                           | 2304001   |
| Fracture of coccyx (disorder)                                                 | 125871005 |
| Fracture of lumbar spine (disorder)                                           | 125608002 |

|                                                              |           |
|--------------------------------------------------------------|-----------|
| Fracture of lumbar spine and/or pelvis (disorder)            | 207986006 |
| Injury of cauda equina (disorder)                            | 230614002 |
| Lumbar disc prolapse with myelopathy (disorder)              | 202731005 |
| Multiple fractures of lumbar spine and/or pelvis (disorder)  | 207993005 |
| Open dislocation of coccyx (disorder)                        | 44237008  |
| Open fracture of lumbar vertebra with spinal cord injury     | 48956000  |
| Open fracture of sacrum AND/OR coccyx with spinal cord       | 65491009  |
| Traumatic dislocation of joint of lumbar vertebra (disorder) | 129166009 |

---

SNOMED CT-AU (EDRS), Systematized Nomenclature of Medicine – Clinical Terms – Australian Version (Emergency Department Reference Set).

Supplementary file 2. Frequency (%) of diagnoses of disorders beyond the lumbar spine (n = 7,631) and percentage (%) in relation to the total number of ED presentations (n = 14,024)

| Diagnoses                                                 | Frequency | %      |
|-----------------------------------------------------------|-----------|--------|
| Renal disorders                                           | 2644      | 18.85% |
| Flank pain                                                | 896       | 6.39%  |
| Spinal conditions with generic diagnostic codes           | 757       | 5.40%  |
| Other musculoskeletal conditions                          | 652       | 4.65%  |
| Abdominal disorders                                       | 504       | 3.59%  |
| Urinary tract disorders                                   | 315       | 2.25%  |
| Gastrointestinal disorders                                | 237       | 1.69%  |
| Falls                                                     | 199       | 1.42%  |
| Other fractures                                           | 198       | 1.41%  |
| Respiratory system disorders                              | 162       | 1.16%  |
| Chest wall pain                                           | 135       | 0.96%  |
| Did not wait for treatment                                | 106       | 0.76%  |
| Skin disorders                                            | 76        | 0.54%  |
| Motor vehicle accident                                    | 60        | 0.43%  |
| Herpes zoster                                             | 52        | 0.37%  |
| Reproductive system disorders                             | 47        | 0.34%  |
| Neurological condition                                    | 46        | 0.33%  |
| Heart condition                                           | 36        | 0.26%  |
| Viral disease                                             | 36        | 0.26%  |
| Cancer                                                    | 35        | 0.25%  |
| Psychiatric disorders                                     | 32        | 0.23%  |
| Appendicitis                                              | 25        | 0.18%  |
| Vascular disorders                                        | 24        | 0.17%  |
| Drug-related disorders                                    | 22        | 0.16%  |
| Systemic infection                                        | 20        | 0.14%  |
| Fever                                                     | 19        | 0.14%  |
| Alcohol-related problem                                   | 17        | 0.12%  |
| Anal-related disorders (fissure, spasm, hemorrhage, etc.) | 16        | 0.11%  |
| Generally unwell                                          | 16        | 0.11%  |
| Post-operative related disorders                          | 15        | 0.11%  |
| Pregnancy                                                 | 15        | 0.11%  |
| Rheumatic conditions                                      | 15        | 0.11%  |
| Hematoma                                                  | 14        | 0.10%  |
| Liver condition                                           | 13        | 0.09%  |
| No disease                                                | 13        | 0.09%  |
| Diarrhea and vomiting                                     | 12        | 0.09%  |
| Infectious disorders beyond the lumbar spine              | 12        | 0.09%  |
| Anemia                                                    | 10        | 0.07%  |
| Electrolyte imbalance                                     | 10        | 0.07%  |
| Physical assault                                          | 9         | 0.06%  |
| Generalized weakness (asthenia and cachexia) and lethargy | 8         | 0.06%  |
| Left against medical advice                               | 8         | 0.06%  |
| Syncope                                                   | 7         | 0.05%  |
| Benign paroxysmal positional vertigo                      | 6         | 0.04%  |
| Cellulitis                                                | 6         | 0.04%  |

|                                        |   |       |
|----------------------------------------|---|-------|
| Hematological                          | 6 | 0.04% |
| Cloud consciousness                    | 5 | 0.04% |
| Social problem                         | 5 | 0.04% |
| Complication of catheter               | 4 | 0.03% |
| Dehydration                            | 4 | 0.03% |
| Edema                                  | 4 | 0.03% |
| Insect bite                            | 4 | 0.03% |
| Nausea                                 | 4 | 0.03% |
| Osteomyelitis                          | 4 | 0.03% |
| Cramp                                  | 3 | 0.02% |
| Eye disorders                          | 3 | 0.02% |
| Prostate disorders excluding cancer    | 3 | 0.02% |
| Dizziness                              | 2 | 0.01% |
| Lymphatic condition                    | 2 | 0.01% |
| Orthostatic hypotension                | 2 | 0.01% |
| Pelvic mass                            | 2 | 0.01% |
| Spinal fracture (uncertain where)      | 2 | 0.01% |
| Avascular necrosis of bone             | 1 | 0.01% |
| Diabetes mellitus                      | 1 | 0.01% |
| Facial swelling                        | 1 | 0.01% |
| Further opinion sought                 | 1 | 0.01% |
| Hypoxia                                | 1 | 0.01% |
| Jaundice                               | 1 | 0.01% |
| Lactose intolerance                    | 1 | 0.01% |
| Malaria                                | 1 | 0.01% |
| Noncompliance with therapeutic regimen | 1 | 0.01% |
| Numbness                               | 1 | 0.01% |
| Nutritional disorder                   | 1 | 0.01% |
| Splenomegaly                           | 1 | 0.01% |
| Swelling                               | 1 | 0.01% |
| Tinnitus                               | 1 | 0.01% |
| Victim of trauma                       | 1 | 0.01% |

## Supplementary file 3. Medication list as per the ATC Classification System.

| Group                                                        | ATC code                   |
|--------------------------------------------------------------|----------------------------|
| Analgesics                                                   | N02B                       |
| Antidepressants                                              | N06A                       |
| Antiepileptics                                               | N03A                       |
| Non-steroidal anti-inflammatory                              |                            |
| Anti-inflammatory and antirheumatic products, non-steroids   | M01A                       |
| Anti-inflammatory preparations, non-steroids for topical use | M02AA                      |
| Benzodiazepines derivatives and related drugs                | N03AE, N05BA, N05CD, N05CF |
| Corticosteroids for systemic use                             | H02                        |
| Opioids                                                      |                            |
| Opioid anesthetics                                           | N01AH                      |
| Opioids                                                      | N02A                       |
| Opioids in combination with non-opioid analgesics            | N02AJ                      |
| Muscle relaxants                                             | M03                        |

ATC, Anatomical Therapeutic Chemical

Supplementary file 4. Number (%) of different types of opioids used in the ED (n= 2539)

| Opioids, n (%)                                                   | Non-specific LBP (n = 2104) | Radicular LBP (n = 311) | Serious spinal pathology (n = 124) | Total (n = 2539) |
|------------------------------------------------------------------|-----------------------------|-------------------------|------------------------------------|------------------|
| <b>Opioid anesthetics (N01AH)</b>                                |                             |                         |                                    |                  |
| Fentanyl                                                         | 39 (1.83)                   | 5 (1.60)                | 3 (2.38)                           | 47 (1.83)        |
| <b>Opioids (N02A)</b>                                            |                             |                         |                                    |                  |
| Buprenorphine                                                    | 16 (0.76)                   | 4 (1.29)                | 2 (1.61)                           | 22 (0.87)        |
| Codeine                                                          | 20 (0.95)                   | 2 (0.64)                | 0 (0.0)                            | 22 (0.87)        |
| Dextropropoxyphene hydrochloride                                 | 1 (0.05)                    | 0 (0.0)                 | 0 (0.0)                            | 1 (0.04)         |
| Hydromorphone                                                    | 11 (0.52)                   | 1 (0.32)                | 2 (1.61)                           | 14 (0.55)        |
| Methadone                                                        | 7 (0.33)                    | 0 (0.0)                 | 0 (0.0)                            | 7 (0.28)         |
| Morphine                                                         | 216 (10.27)                 | 20 (6.43)               | 21 (16.94)                         | 257 (10.1)       |
| Oxycodone                                                        | 1167 (55.5)                 | 205 (65.9)              | 64 (51.6)                          | 1436 (56.6)      |
| Tramadol                                                         | 54 (2.57)                   | 6 (1.93)                | 2 (1.61)                           | 62 (2.44)        |
| <b>Opioids in combination with non-opioid analgesics (N02AJ)</b> |                             |                         |                                    |                  |
| Oxycodone-Naloxone                                               | 86 (4.09)                   | 18 (5.79)               | 3 (2.42)                           | 107 (4.21)       |
| Paracetamol-Codeine                                              | 280 (13.3)                  | 41 (13.2)               | 10 (8.06)                          | 331 (13.0)       |

## Supplementary file 5. Factors associated with arriving by ambulance (n = 5986)

| Characteristics                                                   | OR (95% CI)          | P-value |
|-------------------------------------------------------------------|----------------------|---------|
| Gender (male)                                                     | 0.91 (0.81 to 1.02)  | 0.12    |
| Age ( $\geq 65$ )                                                 | 2.84 (2.52 to 3.20)  | 0.0001  |
| Socioeconomic status (1-10, 1 denotes lower socioeconomic status) | 1.04 (1.01 to 1.06)  | 0.0001  |
| Representation within 48 hours (yes)                              | 1.03 (0.58 to 1.84)  | 0.89    |
| Presentation during working hours (yes)                           | 0.78 (0.69 to 0.87)  | 0.0001  |
| Triage category (5, less urgent)                                  |                      |         |
| 2                                                                 | 6.33 (3.47 to 11.54) | 0.0001  |
| 3                                                                 | 3.46 (2.19 to 5.47)  | 0.0001  |
| 4                                                                 | 2.48 (1.58 to 3.90)  | 0.0001  |
| Lumbar spine condition (non-serious LBP)                          | 1.02 (0.77 to 1.34)  | 0.86    |



## Supplementary file 6. Factors associated with of any lumbar spine imaging (n = 5986)

| Characteristics                                                   | OR (95% CI)         | P-value |
|-------------------------------------------------------------------|---------------------|---------|
| Gender (male)                                                     | 0.85 (0.75 to 0.96) | 0.01    |
| Age ( $\geq 65$ )                                                 | 1.79 (1.56 to 2.04) | 0.0001  |
| Socioeconomic status (1-10, 1 denotes lower socioeconomic status) | 1.01 (0.99 to 1.04) | 0.21    |
| Arrived by ambulance (yes)                                        | 1.36 (1.19 to 1.56) | 0.0001  |
| Representation within 48 hours (yes)                              | 0.74 (0.37 to 1.47) | 0.39    |
| Presentation during working hours (yes)                           | 1.18 (1.03 to 1.34) | 0.01    |
| Triage category (5, less urgent)                                  |                     |         |
| 2                                                                 | 4.72 (2.26 to 9.87) | 0.0001  |
| 3                                                                 | 3.58 (1.95 to 6.57) | 0.0001  |
| 4                                                                 | 3.06 (1.68 to 5.59) | 0.0001  |
| Lumbar spine condition (non-serious LBP)                          | 0.53 (0.40 to 0.70) | 0.0001  |
| ED length of stay (hours)                                         | 1.17 (1.14 to 1.20) | 0.0001  |

## Supplementary file 7. Factors associated with use of opioids (n = 2395)

| Characteristics                                                   | OR (95% CI)          | P-value |
|-------------------------------------------------------------------|----------------------|---------|
| Gender (male)                                                     | 1.07 (0.89 to 1.30)  | 0.42    |
| Age ( $\geq 65$ )                                                 | 1.04 (0.84 to 1.29)  | 0.68    |
| Socioeconomic status (1-10, 1 denotes lower socioeconomic status) | 1.03 (0.99 to 1.07)  | 0.06    |
| Arrived by ambulance (yes)                                        | 1.33 (1.06 to 1.66)  | 0.01    |
| Representation within 48 hours (yes)                              | 0.87 (0.34 to 2.18)  | 0.76    |
| Presentation during working hours (yes)                           | 0.81 (0.67 to 0.98)  | 0.03    |
| Triage category (5, less urgent)                                  |                      |         |
| 2                                                                 | 5.71 (1.97 to 16.50) | 0.001   |
| 3                                                                 | 6.72 (3.20 to 14.10) | 0.0001  |
| 4                                                                 | 4.62 (2.24 to 9.54)  | 0.0001  |
| Lumbar spine condition (non-serious LBP)                          | 1.65 (1.07 to 2.55)  | 0.022   |
| ED length of stay (hours)                                         | 1.39 (1.31 to 1.48)  | 0.0001  |

## Supplementary file 8. Factors associated with admission to hospital (n = 5986)

| Characteristics                                                   | OR (95% CI)         | P-value |
|-------------------------------------------------------------------|---------------------|---------|
| Gender (male)                                                     | 0.74 (0.63 to 0.87) | 0.0001  |
| Age ( $\geq 65$ )                                                 | 3.05 (2.59 to 3.59) | 0.0001  |
| Socioeconomic status (1-10, 1 denotes lower socioeconomic status) | 0.97 (0.94 to 1.0)  | 0.169   |
| Arrived by ambulance (yes)                                        | 2.98 (2.53 to 3.51) | 0.0001  |
| Representation within 48 hours (yes)                              | 2.07 (1.03 to 4.13) | 0.03    |
| Presentation during working hours (yes)                           | 1.74 (1.48 to 2.05) | 0.0001  |
| Triage category (5, less urgent)                                  |                     |         |
| 2                                                                 | 3.73 (1.48 to 9.38) | 0.005   |
| 3                                                                 | 2.99 (1.37 to 6.48) | 0.006   |
| 4                                                                 | 1.83 (0.84 to 3.95) | 0.12    |
| Lumbar spine condition (non-serious LBP)                          | 0.23 (0.17 to 0.32) | 0.0001  |
| ED length of stay (hours)                                         | 1.41 (1.37 to 1.46) | 0.0001  |
